1 **Urinary Volatile Organic Compound Metabolites are Associated with High Blood**  
2 **Pressure Among Non-smoking Participants in the National Health and Nutrition**  
3 **Examination Survey (2011-2018)**

4  
5 **Authors:**

6 Katlyn E. McGraw<sup>1\*</sup> PhD, Arce Domingo-Relloso<sup>1</sup> PhD, Daniel W. Riggs<sup>2</sup> PhD, Danielle  
7 N. Medgyesi<sup>1</sup> MS, Raghav Neupane<sup>3</sup> MPH, Jeanette A. Stingone<sup>4</sup> PhD, Tiffany R.  
8 Sanchez<sup>1</sup> PhD

9  
10 **Affiliations:**

11 <sup>1</sup>Columbia University Mailman School of Public Health  
12 Department of Environmental Health Science  
13 722 W 168th St, New York, NY 10032

14  
15 <sup>2</sup>Christina Lee Browne Envirome Institute  
16 University of Louisville  
17 322 W Muhammad Ali Blvd, Louisville, KY 40202

18  
19 <sup>3</sup>Dr. Kiran C. Patel College of Osteopathic Medicine  
20 Nova Southeastern University  
21 3200 S University Dr, Fort Lauderdale, FL 33328

22  
23 <sup>4</sup> Columbia University Mailman School of Public Health  
24 Department of Epidemiology  
25 722 W 168th St, New York, NY 10032

26  
27  
28 **\* Correspondence:**

29 Katlyn E. McGraw, PhD  
30 Columbia University Mailman School of Public Health  
31 Department of Environmental Health Science  
32 722 W 168th St, New York, NY 10032  
33 Tel: 212-305-4596  
34 Email: [kem2240@cumc.columbia.edu](mailto:kem2240@cumc.columbia.edu)

35  
36  
37 **Short title:** VOC Exposure and Blood Pressure NHANES 2011-2018

38  
39 **Word count:** 7,851

40  
41 **Keywords:**

42 Volatile organic compounds, blood pressure, mixtures, acrolein, butadiene

44 **ABSTRACT**

45 Background: Volatile organic compounds (VOCs) are ubiquitous environmental  
46 pollutants. Exposure to VOCs is associated with cardiovascular disease (CVD) risk  
47 factors, including elevated blood pressure (BP) in susceptible populations. However,  
48 research in the general population, particularly among non-smoking adults, is limited.  
49 We hypothesized that higher VOC exposure is associated with higher BP and  
50 hypertension, among non-smokers.

51  
52 Methods: We included four cycles of data (2011-2018) of non-smoking adults (n=4,430)  
53 from the National Health and Nutrition Examination Survey (NHANES). Urinary VOC  
54 metabolites were measured by ultra-performance liquid chromatography–mass  
55 spectrometry, adjusted for urine dilution, and log-transformed. We estimated mean  
56 differences in BP using linear models and prevalence ratio of stage 2 hypertension  
57 using modified Poisson models with robust standard errors. Models were adjusted for  
58 age, sex, race and ethnicity, education, body mass index, estimated glomerular filtration  
59 rate and NHANES cycle.

60  
61 Results: Participants were 54% female, with a median age of 48 years, 32.3% had  
62 hypertension, and 7.9% had diabetes. The mean differences (95% CI) in systolic BP  
63 were 1.61 (0.07, 3.15) and 2.46 (1.01, 3.92) mmHg when comparing the highest to  
64 lowest quartile of urinary acrolein (CEMA) and 1,3-butadiene (DHBMA) metabolites.  
65 The prevalence ratios (PR) for hypertension were 1.06 (1.02, 1.09) and 1.05 (1.01,

66 1.09) when comparing the highest to lowest quartiles of urinary acrolein (CEMA) and  
67 1,3-butadiene (DHBMA), respectively.

68

69 Conclusions: Exposure to VOCs may be relevant yet understudied environmental  
70 contributors to CVD risk in the non-smoking, US population.

## 71 **NON-STANDARD ABBREVIATIONS AND ACRONYMS**

72 3HPMA – N-Acetyl-S-(3-hydroxypropyl)-L-cysteine

73 BMI – Body mass index

74 BKMR – Bayesian Kernel Machine Regression

75 BP – Blood pressure

76 CEMA – N-Acetyl-S-(2-carboxyethyl)-L-cysteine

77 CI – Confidence intervals

78 CVD – Cardiovascular disease

79 DBP – Diastolic blood pressure

80 DHBMA – N-Acetyl-S-(3,4-dihydroxybutyl)-L-cysteine

81 eGFR – Estimated glomerular filtration

82 HDL – High density lipoprotein cholesterol

83 HPMMA – N-Acetyl-S-(3-hydroxypropyl-1-methyl)-L-cysteine

84 MA – Mandelic acid

85 MHBMA3 – N-Acetyl-S-(4-hydroxy-2-butenyl)-L-cysteine

86 MU – t,t-Muconic Acid

87 NHANES – National Health and Nutrition Examination Survey

88 PGA – Phenylglyoxylic acid

89 PIPs – Posterior inclusion probabilities

90 PMA – N-Acetyl-S-(phenyl)-L-cysteine

91 SBP – Systolic blood pressure

92 VOCs – Volatile organic compounds

93

## 94 **INTRODUCTION**

95 Volatile organic compounds (VOCs) are an under regulated class of chemicals  
96 characterized by low molecular weight and high vapor pressure, properties which lead  
97 to rapid vaporization in ambient air.<sup>1-4</sup> Ambient VOCs are critical in the formation of  
98 harmful secondary air pollutants such as ozone and PM<sub>2.5</sub>.<sup>5, 6</sup> However, VOCs emitted  
99 directly from sources are just as harmful and include tobacco smoke, vehicle exhaust,  
100 industrial solvents, manufacture of consumer goods, and oil and gas refining.<sup>7, 8</sup> Indoor,  
101 VOC levels can be up to ten times higher than ambient VOC levels.<sup>8</sup> Additionally, some  
102 VOCs are produced endogenously through processes like lipid peroxidation, glycation,  
103 and amino acid oxidation.<sup>9-11</sup> Therefore, VOCs are ubiquitous environmental  
104 exposures.

105

106 Urinary biomarkers of VOC exposure provide proximal, personal-level assessments of  
107 all routes of exposure to VOCs, including ambient, indoor, and endogenous sources.  
108 VOC metabolites from human biomonitoring have been associated with physician-  
109 diagnosed cardiovascular disease (CVD),<sup>12</sup> metabolic syndrome,<sup>13</sup> CVD risk factors,<sup>14-17</sup>  
110 and ischemic heart disease mortality,<sup>18</sup> particularly for acrolein, benzene, 1,3-butadiene,  
111 crotonaldehyde, and styrene. However, these studies identified associations in small,

112 geographically homogenous cohorts, and in CVD-susceptible populations, including  
113 individuals who smoke. The relation between VOC biomarkers and blood pressure  
114 among non-smoking adults has not yet been elucidated in a large, representative  
115 sample of the U.S. population, such as the National Health and Nutrition Examination  
116 Survey (NHANES).

117  
118 In this study, we evaluated the association between participants' VOC metabolite levels  
119 in urine with measured blood pressure (BP) levels and hypertension defined as systolic  
120 BP  $\geq$ 140 mmHg, diastolic BP  $\geq$ 90 mmHg, or self-reported use of BP medications<sup>19</sup> using  
121 data from a representative sample of the non-smoking U.S. adult population  
122 participating in NHANES from 2011-2018. We hypothesized that exposure to VOCs,  
123 specifically urinary metabolites of acrolein, benzene, 1,3-butadiene, crotonaldehyde,  
124 and styrene, would be associated with higher BP levels and prevalence of hypertension.  
125 Additionally, we conducted an exploratory assessment of all urinary VOC metabolites  
126 measured in NHANES and mixtures of urinary VOC metabolites.

## 127 **METHODS**

### 128 *Study Population*

129 Led by the National Center for Health Statistics (NCHS) at the Centers for Disease  
130 Control and Prevention, NHANES is a series of continuous surveys designed to assess  
131 the health and nutritional status of adults and children in the U.S. NHANES is designed  
132 as a multiyear, stratified, clustered four-stage sample of noninstitutionalized civilians  
133 with fixed sample-size targets for sampling domains defined by age, sex, race and  
134 ethnicity, and socioeconomic status, with data released in 2-year cycles. Participants

135 gave informed consent of the survey process and their rights as a participant, and the  
136 survey was approved by the NCHS Review Board.<sup>20</sup> Questionnaires were administered  
137 in-home followed by standardized health examinations in specially equipped mobile  
138 examination centers. Deidentified and detailed health datasets are publicly available on  
139 the NHANES website.<sup>21</sup> We combined NHANES data from four cycles (2011-2018) to  
140 create a larger and more geographically diverse sample, including all cycles with  
141 available data on BP and urinary VOC metabolites.

142

### 143 *Exclusion Criteria*

144 Of the 39,156 NHANES participants from 2011-2018 combined, 23,825 were 18 years  
145 of age and older. We focused on adults because blood pressure varies in childhood and  
146 adolescence. There were 7,626 participants with measured urinary VOC metabolites  
147 and BP examination data because 1/3 subsample at each cycle are analyzed for  
148 environmental chemicals. Because tobacco smoke is a primary source of VOC  
149 exposure, self-reported cigarette smoking, and serum cotinine data were used to  
150 determine smoking status. We excluded 1,405 individuals who reported currently  
151 smoking cigarettes, an additional 451 individuals with serum cotinine levels >10 µg/L,  
152 reflecting recent nicotine exposure, and 480 missing self-reported cigarette smoking  
153 status or cotinine data, for a final sample of 5,290 non-smoking participants. We further  
154 excluded an additional 860 participants with missing data, including 492 missing priority  
155 urinary VOCs, 172 missing systolic blood pressure (SBP), 11 missing diastolic blood  
156 pressure (DBP), 81 missing urine creatinine, 42 missing BMI, 35 missing diabetes  
157 status, 21 missing estimated glomerular filtration rate (eGFR), 3 missing triglycerides

158 (TG), 2 missing high density lipoproteins (HDL), and 1 missing education, for a total of  
159 4,430 participants included in our analysis (Figure S1).

160

### 161 *Urinary VOC Metabolites*

162 Urine specimens were collected at mobile examination centers, frozen at -20°C, and  
163 shipped to the Division of Environmental Health Laboratory Sciences, National Center  
164 for Environmental Health for analysis.<sup>22</sup> Ultra-performance liquid chromatography  
165 coupled with electrospray tandem mass spectrometry was used to measure 35 VOC  
166 metabolites of 20 parent compounds in urine in nanograms per milliliter (ng/mL).<sup>23</sup>

167

168 We report results for 5 hypothesized, priority parent VOCs and their 9 associated  
169 urinary metabolites: acrolein (CEMA – N-Acetyl-S-(2-carboxyethyl)-L-cysteine  
170 and 3HPMA – N-Acetyl-S-(3-hydroxypropyl)-L-cysteine), benzene (MU – t,t-Muconic  
171 Acid and PMA – N-Acetyl-S-(phenyl)-L-cysteine), 1,3-butadiene (DHBMA – N-Acetyl-S-  
172 (3,4-dihydroxybutyl)-L-cysteine and MHBMA3 – N-Acetyl-S-(4-hydroxy-2-butenyl)-L-  
173 cysteine), crotonaldehyde (HPMMA – N-Acetyl-S-(3-hydroxypropyl-1-methyl)-L-  
174 cysteine), and styrene (PGA – N-Acetyl-S-(phenyl)-L-cysteine and MA – Mandelic  
175 acid). PGA and MA are metabolites of ethylbenzene and styrene. See Table S1 for all  
176 parent compounds, long and short metabolite names, NHANES cycle availability, and  
177 limits of detection (LOD). Values below the LOD were imputed with the  $LOD/\sqrt{2}$ .

178 Although the benzene metabolite, MU, was only available for one cycle (2017-2018,  
179 n=1,046), we included MU in primary analyses for comparison to the other benzene  
180 metabolite available at the other three cycles, PMA (2011-2016, n=3,207). To correct for

181 urine dilution, we divided all urinary VOC metabolites by urine creatinine and reported  
182 levels as nanogram of VOC metabolite per milligrams of creatinine (ng/mg).

183

#### 184 *Blood Pressure and Hypertension*

185

186 BP measurements were collected at mobile examination centers using a

187 sphygmomanometer and appropriately sized cuff for the participant's arm

188 circumference. Three BP readings were collected after five minutes of seated rest. A

189 fourth measurement was collected if a measurement was interrupted or incomplete. All

190 recorded measurements of SBP and DBP were averaged and used as continuous

191 outcome variables.

192

193 For hypertension, our primary endpoint was defined by having either a mean SBP  $\geq 140$

194 mmHg, a mean DBP  $\geq 90$  mmHg, or self-reported use of BP medications, also known

195 as stage 2 hypertension.<sup>19</sup> We also conducted sensitivity analyses using two alternate

196 definitions: 1) stage 1 hypertension, where participants were hypertensive if mean SBP

197  $\geq 130$  mmHg, mean DBP  $\geq 80$  mmHg, or were taking BP medications, and 2) if

198 individuals self-reported physician-diagnosed hypertension.

199

#### 200 *Covariates*

201 Age, sex, race and ethnicity, education, and household income were acquired from self-

202 reported questionnaires. Race and ethnicity were classified as Mexican American,

203 Other Hispanic, Non-Hispanic White, Non-Hispanic Black, Non-Hispanic Asian, and

204 Other Races, including multiple races. We reclassified education as less than a high



205 school education, a high school education or GED equivalent, some college, or  
206 bachelor's degree or more. Household income categories were reduced to \$0-\$24,999,  
207 \$25,000-\$54,999, \$55,000-\$74,999, and  $\geq$ \$75,000. Body mass index (BMI, kg/m<sup>2</sup>) was  
208 collected during examination at mobile examination center. Estimated glomerular  
209 filtration rate (eGFR) was calculated using the Chronic Kidney Disease Epidemiology  
210 Collaboration equation,<sup>24</sup> which estimates GFR for age, sex, and serum creatinine in  
211  $\mu$ mol/L. The eGFR can influence metabolite excretion in urine and was therefore used  
212 for adjustment in our models. Total cholesterol and high-density lipoprotein (HDL)  
213 cholesterol were measured in blood collected at mobile examination centers. Diabetes  
214 status was determined based on self-reported responses that the participant was ever  
215 told by a doctor they had diabetes or were taking medications to lower blood sugar.  
216 Prevalent CVD status was determined based on self-reported responses that the  
217 participant was ever told by a doctor they had congestive heart failure, coronary heart  
218 disease, angina or angina pectoris, heart attack, or stroke.

219

## 220 *Statistics*

221 Combined NHANES survey cycles and weights produce estimates representative of the  
222 U.S. civilian noninstitutionalized population at the midpoint of the combined survey  
223 period. We constructed new sample weights for the combined cycles (4 cycles, 2011-  
224 2018) by multiplying 2-year subsample weights for environmental chemicals by 1/4 (for  
225 4 NHANES cycles) as described.<sup>25</sup>

226

227 To characterize our study population, we stratified by hypertension status and  
228 continuous and categorical variables of interest using t-tests and  $\chi^2$  tests. We used  
229 linear regression models for normally distributed BP and modified Poisson regression  
230 with robust standard errors for dichotomous hypertension outcomes to estimate  
231 prevalence ratios of hypertension.<sup>26</sup> Urine VOC metabolite levels were modeled as: (1)  
232 quartiles (to compare each of the highest three quartiles to the lowest quartile), (2) per  
233 interquartile range (IQR) on log-transformed levels (to compare the 75th to the 25th  
234 percentile), and (3) log-transformed levels with restricted quadratic splines (to evaluate  
235 the flexible dose-response relationship). Because NHANES represents a younger, more  
236 general population, we chose to adjust for sociodemographic factors age, sex, race and  
237 ethnicity, education, eGFR, and NHANES cycle year and BMI in our main model, Model  
238 1, as to not adjust away potential mediating CVD risk factors based on literature reviews  
239 for BP and hypertension.<sup>27, 28</sup> In Model 2, we further adjust for traditional CVD risk  
240 factors including total cholesterol, HDL, triglycerides, diabetes status, and BP  
241 medications. We present 9 priority urinary VOC metabolites of parent VOCs acrolein,  
242 benzene, 1,3-butadiene, crotonaldehyde, and styrene, from Model 1, in the main text.  
243 Model estimates are population weighted mean differences in BP or population  
244 weighted prevalence ratio of hypertension with 95% confidence intervals (CI). All central  
245 tendency estimates, proportions and effect estimates are population weighted.

246

247 *Secondary analyses*

248 In secondary analyses, we examined the other 12 VOC metabolites measured in  
249 NHANES. We used Wald tests and conducted subgroup analysis to assess effect  
250 modification by subgroups of age, sex, and race and ethnicity.

251  
252 To address potential co-pollutant exposure and collinearity, we used hierarchical  
253 Bayesian Kernel Machine Regression (BKMR). Because BKMR cannot account for  
254 complex survey weighting, we consider these exploratory analyses. BKMR is a kernel-  
255 regression based machine learning method that characterizes the exposure response  
256 function of multiple predictors on a health outcome while other predictors are fixed to a  
257 specific percentile.<sup>29, 30</sup> The method also allows us to examine statistical interactions  
258 between VOC metabolites within the mixture and joint associations between the whole  
259 mixture and health outcomes. The hierarchical BKMR uses hierarchical variable  
260 selection to create posterior inclusion probabilities (PIPs) that quantify the relative  
261 importance by selecting 1) at the group level and 2) by selecting exposures of each  
262 group.<sup>29</sup> All metabolites with the same parent compound were grouped in hierarchical  
263 analysis except for MHBMA3 and HPMMA which were more highly correlated than  
264 DHBMA and MHBMA3 (Figure S2). We excluded the benzene metabolites, MU and  
265 PMA, due to missing cycles. BKMRs were run with 10,000 iterations and the tuning  
266 parameter  $r_{\text{jump}}$  value of 0.1 for continuous SBP and DBP and dichotomous  
267 hypertension to achieve higher acceptance rates.

## 268 269 *Sensitivity Analyses*

270 We conducted several sensitivity analyses. Because a number of participants reported  
271 use of BP lowering medications, we assessed differences between measured and

272 underlying BP.<sup>31</sup> For individuals self-reporting use of BP lowering medications we  
273 imputed underlying BP values by adding a 10 mm Hg or 5 mm Hg constant to measured  
274 SBP or DBP, respectively.<sup>31</sup> Additionally, we assessed differences between Stage 1,  
275 Stage 2, and physician-diagnosed hypertension.

276  
277 Data analysis was performed in R (version 3.1.3)<sup>32</sup> using the nhanesA<sup>33</sup>, tidyverse<sup>34</sup> and  
278 survey package<sup>35</sup> to account for the complex survey design and sampling weights.

279

## 280 **RESULTS**

281 The characteristics of NHANES participants by hypertension status are shown in Table  
282 1. Participants were 54% female, with a median age of 48 years, 32.3% had  
283 hypertension, and 17.9% had diabetes mellitus. Participants with hypertension were  
284 older and more likely to be non-Hispanic White or non-Hispanic Black, had higher BMI,  
285 lower eGFR, lower HDL cholesterol, higher triglycerides, higher total cholesterol, and  
286 were more likely to have self-reported physician diagnosed CVD and diabetes mellitus.  
287 Additionally, participants with hypertension had higher median levels of all priority  
288 urinary VOC metabolites compared to participants without hypertension (Table 2 and  
289 Table S2), except for the PMA benzene metabolite.

290

291 Results for priority VOC metabolites and BP outcomes are shown in Table 3. For  
292 acrolein, the urinary metabolite CEMA was associated with higher SBP and a higher  
293 prevalence of hypertension. When comparing the highest to lowest quartile, the mean  
294 difference (MD) (95%CI) was 1.61 (0.07, 3.15) mmHg for SBP, and the prevalence ratio

295 (PR) (95%CI) of hypertension was 1.06 (1.02, 1.09). Estimates for SBP and  
296 hypertension were also statistically significant per log IQR-change and, although  
297 attenuated, generally remained significant after further adjustment for CVD risk factors.  
298 In the restricted quadratic spline models, there were clear positive dose-response  
299 relationships with SBP and PR of hypertension observed for CEMA above 34.20 ng/mg  
300 creatinine (Figures 1 and 2). For the other acrolein metabolite, 3HPMA, results were  
301 positive but not significant for SBP (MD [95%CI]: 1.28 [-0.33, 2.90] mmHg); however,  
302 the association with hypertension was statistically significant (PR [95%CI]: 1.05 [1.01,  
303 1.09]).

304  
305 Likewise, for 1,3-butadiene, the urinary metabolite DHBMA was associated with higher  
306 SBP and a higher prevalence of hypertension. When comparing the highest to lowest  
307 quartile of DHBMA, the MD in SBP was 2.46 (1.01, 3.92) mmHg and the PR of  
308 hypertension was 1.05 (1.01, 1.09). Estimates for SBP and hypertension were also  
309 statistically significant per log IQR-change and, although attenuated, generally remained  
310 significant after further adjustment for CVD risk factors. The linear association apparent  
311 in the quartile models was also observed with the restricted quadratic spline models,  
312 with clear positive dose-response relationships with SBP and PR of hypertension  
313 observed for DHBMA above 252 ng/mg creatinine (Figures 1 and 2). For the other 1,3-  
314 butadiene metabolite, MHBMA3, results were less consistent, but there was an  
315 association with hypertension per log IQR of MHBMA3 (PR [95%CI]: 1.01 [1.00, 1.02]).

316

317 For the other priority metabolites, results were less consistent. The benzene metabolite,  
318 MU, was associated with higher SBP per log IQR of MU (MD [95%CI]: 0.76 [0.05, 1.48]  
319 mmHg), but not with higher prevalence of hypertension. When comparing the highest  
320 quartile to the lowest quartile, the crotonaldehyde metabolite, HPMMA, and the styrene  
321 metabolite, MA, were associated with higher prevalence of hypertension (PR [95%CI]:  
322 1.06 [1.02, 1.10], and 1.05 [1.01, 1.08]), respectively. Estimates for HPMMA and MA  
323 and SBP trended positive but were not statistically significant. Additionally, we found no  
324 significant results for any of the priority VOC metabolites and DBP (Table 3 and  
325 Figure S3). Results for the other urinary VOC metabolites available in NHANES (i.e.,  
326 parent compounds: acrylamide, acrylonitrile, 1-bromopropane, carbon disulfide,  
327 cyanide, n,n-dimethylformamide, isoprene, propylene oxide, toluene, and xylene) are  
328 reported in Table S3.

329

330 In Wald tests for interaction, we found significant interactions between age and all  
331 priority VOC metabolites except for the benzene metabolite PMA (Table S4).

332 In models stratified by age groups for priority VOCs, the associations with SBP were  
333 stronger for the age subgroup 40-64 for metabolites of benzene (MU), 1,3-butadiene  
334 (DHBMA), and styrene (PGA). For hypertension, associations were stronger for the age  
335 group 40-64 and  $\geq 65$  for metabolites of acrolein (CEMA) and crotonaldehyde (HPMMA),  
336 the age group 40-64 for the metabolites of benzene (MU) and styrene (PGA), and the  
337 age group  $\geq 65$  for metabolites of 1,3-butadiene (MHBMA3) and styrene (MA). We found  
338 significant interactions between sex and metabolites of acrolein, 1,3-butadiene, and  
339 crotonaldehyde. By sex, the association with SBP was stronger in females for

340 metabolites of acrolein (CEMA, 3HPMA), 1,3-butadiene (DHBMA) and crotonaldehyde  
341 (HPMMA). We found significant interactions between race and ethnicity for all VOC  
342 metabolites except for the benzene metabolite PMA and the styrene metabolite PGA.  
343 The association with SBP was stronger for Mexican Americans for 1,3-butadiene  
344 (DHBMA), for Non-Hispanic Asians for acrolein (CEMA), and for Non-Hispanic Blacks  
345 for styrene (MA). The association with hypertension was stronger for Non-Hispanic  
346 Whites for metabolites of acrolein (3HPMA), benzene (MU), crotonaldehyde (HPMMA)  
347 and styrene (MA). Patterns for other VOCs were inconsistent.

348

349 In sensitivity analyses, we found that effect sizes of associations with underlying BP  
350 were consistent with the main analyses of original, measured BP (data not shown).  
351 Similarly, the use of Stage 2 or physician diagnosed definitions of hypertension did not  
352 significantly change effect sizes; however, use of stage 1 hypertension outcome  
353 attenuated associations, except for the styrene metabolite (MA) (Figure S4).

354

355 Urinary VOC metabolites originating from the same parent compound were highly  
356 correlated except for 1,3-butadiene metabolites, where MHBMA3 was more highly  
357 correlated with crotonaldehyde metabolite, HPMMA (Figure S2). We found no  
358 significant association between the VOC metabolite mixture and SBP (Figure S5).  
359 However, the VOC mixture and overall risk of hypertension was significant and positive.  
360 Conditional posterior inclusion probabilities were higher for acrolein metabolite, CEMA,  
361 and 1,3-butadiene metabolite, DHBMA, for SBP and CEMA for hypertension (Table S5).

362

363 **DISCUSSION**

364 In this nationally representative study of non-smoking adults, we found that the acrolein  
365 metabolite, CEMA, and the 1,3-butadiene metabolite, DHBMA, were consistently and  
366 significantly associated with higher SBP and higher prevalence of hypertension in  
367 quartile, log IQR, and restricted spline models. The other priority VOC metabolites were  
368 less consistent across BP outcomes. Estimates were attenuated after adjustment for  
369 cardiovascular risk factors. Exploratory hierarchical BKMR analyses supported acrolein  
370 and 1,3-butadiene as important contributors to SBP and hypertension risk and the  
371 overall mixture of VOC metabolites (excluding benzene) was associated with  
372 hypertension.

373  
374 Elevated BP is an important risk factor for the development of CVD and is associated  
375 with the highest population attributable fraction for CVD deaths in the U.S. (40.6%).<sup>36</sup>  
376 Systolic hypertension is usually the result of arterial thickening and stiffening caused  
377 either by atherosclerosis, medial degradation, or impaired endothelial-mediated  
378 vasodilation,<sup>37</sup> processes that have been shown to be sensitive to VOCs in experimental  
379 studies.<sup>14, 38</sup> Taken together, these observations suggest that exposure to VOCs,  
380 particularly acrolein and 1,3-butadiene, may be significant contributors to the  
381 development of CVD, in the general non-smoking population.

382  
383 Among NHANES 2011-2018 participants the acrolein metabolite, CEMA, was  
384 associated with higher SBP and prevalence of hypertension and the 3HPMA metabolite  
385 was associated with higher prevalence of hypertension. Acrolein is a pesticide,



386 combustion byproduct, precursor in the production of other chemicals, and byproduct of  
387 lipid peroxidation, glycation, and amino acid oxidation; 3HPMA and CEMA account for  
388 about 30% of the dose from exposure.<sup>39</sup> Epidemiological evidence shows acrolein  
389 metabolites are associated with SBP among nonsmoking adults, including in a cohort of  
390 308 adults in Louisville, KY of mean age 51.7 years (MD [95%CI] CEMA: 1.2 [-0.3, 3.3]  
391 mmHg and 3HPMA: 0.98 [0.04, 1.9] mmHg)<sup>14</sup> and a cohort of 778 Black participants in  
392 Jackson, MS of mean age 51.3 years (CEMA: 1.6 [0.4, 2.7] mmHg and 3HPMA: 0.8  
393 [0.01, 1.6] mmHg).<sup>40</sup> However, associations between acrolein metabolites and  
394 hypertension were null among participants in Jackson, MS. A 2022 analysis of ambient  
395 VOC exposure in the Sister Study (n=47,467) found that ambient acrolein exposure was  
396 associated with a greater risk of hypertension, particularly among never smoking  
397 women 35-74 years of age.<sup>41</sup> Likewise, in a nested case-cohort study of non-smoking  
398 individuals in northeastern Iran (n=1,198), there was an increased hazard ratio of  
399 ischemic heart disease mortality associated with metabolites of acrolein (CEMA, 2.11  
400 (1.31, 3.40) and 3HPMA, 2.99 (1.60, 5.59)) when comparing the highest tertile to the  
401 lowest.<sup>18</sup>

402  
403 In this study, we also found the 1,3-butadiene metabolite, DHBMA, was positively  
404 associated with higher SBP and greater risk of hypertension, and MHBMA3 was  
405 associated with higher prevalence of hypertension. Most human exposure from 1,3-  
406 butadiene occurs from incomplete combustion of fossil fuels and burning of biomass.<sup>42</sup>  
407 DHBMA is the most abundant metabolite in urine due to its natural background, which  
408 may be caused by endogenous sources.<sup>43, 44</sup> It is unknown whether high background

409 levels of DHBMA are due to 1,3-butadiene exposures or endogenous sources like lipid  
410 peroxidation. Additionally, crotonaldehyde is produced endogenously from the  
411 metabolism of 1,3-butadiene and may contribute to higher levels of DHBMA.<sup>45-47</sup>  
412 Although MHBMA3 is a sensitive marker of 1,3-butadiene exposure, DHBMA is not a  
413 sensitive marker,<sup>48</sup> and does not decrease with smoking cessation, compared to  
414 MHBMA3.<sup>49</sup> Therefore, DHBMA may be a relevant biomarker for CVD risk,<sup>50</sup> but may  
415 not be indicative of 1,3-butadiene exposure. In the Sister Study (n=47,467), ambient  
416 1,3-butadiene at the census tract level was associated with 1.05 (95% CI 1.00, 1.10)  
417 greater risk of hypertension.<sup>41</sup> Additionally, there was a higher ischemic heart disease  
418 mortality hazard ratio associated with 1,3-butadiene [DHBMA, 2.49 (1.50, 4.15)] in a  
419 recent study of non-smoking northeastern Iranians (n=1,198).<sup>18</sup> However, associations  
420 were null among participants in the Louisville, KY and Jackson, MS studies.<sup>14, 40</sup> More  
421 studies of low-level 1,3-butadiene exposures are required to better assess the  
422 sensitivity of DHBMA as an exposure biomarker.

423

424 The other priority metabolites were associated with either higher SBP or higher  
425 prevalence of hypertension, but not both. The benzene metabolite, MU (but not PMA),  
426 was associated with higher SBP. This may be due to smaller sample size compared  
427 with the other VOC metabolites. Limited, consistent evidence exists of urinary benzene  
428 metabolites and ambient benzene and cardiovascular outcomes due to ongoing  
429 analytical issues.<sup>51, 52</sup> In the Sister Study, ambient benzene was significantly associated  
430 with a 1.06 (95% CI 1.01, 1.10) greater risk of hypertension among never smokers.<sup>41</sup>  
431 The crotonaldehyde metabolite, HPMMA, was associated with higher prevalence of

432 hypertension. Among nonsmoking Black participants in Jackson, MS, HPMMA was  
433 associated with higher SBP (MD: 1.2 [95%CI: 0.08, 1.8] mm Hg),<sup>40</sup> but associations with  
434 hypertension were null. Similarly, results for HPMMA and BP were null in the Louisville,  
435 KY cohort.<sup>14</sup> The styrene metabolite, MA (but not PGA), was associated with higher  
436 prevalence of hypertension. Consistent with our results, the Consortium of Safe Labor  
437 showed that ambient styrene was associated with greater odds of hypertension and  
438 higher SBP and DBP among normotensive women.<sup>53, 54</sup> Additionally, two longitudinal  
439 studies of occupational co-exposure to 1,3-butadiene and styrene have shown  
440 increased standardized mortality ratios for arteriosclerotic heart disease in non-White  
441 populations;<sup>55-57</sup> there was no data on only styrene exposure. However, in the recent  
442 case-cohort study in Iran, there was an increased risk of ischemic heart disease  
443 mortality associated with both metabolites of styrene [MA, 1.94 (1.18, 3.20) and PGA,  
444 1.54 (1.00, 2.37)].<sup>18</sup>

445  
446 *Limitations & Future Direction*

447 This large study of VOC metabolites and blood pressure in a representative population  
448 of U.S. adults included 4,430 nonsmoking participants and evaluated 35 different VOC  
449 metabolites in urine. To minimize error from multiple testing, we prioritized nine VOC  
450 metabolites from five parent VOCs, acrolein, benzene, 1,3-butadiene, crotonaldehyde,  
451 and styrene, based on prior evidence. All VOC metabolites with >50% observations  
452 above LOD available in NHANES, however, were explored in secondary analyses.  
453 Previous studies have measured VOCs in air and grouped them by structure, functional  
454 group, or as a measure of total VOCs; here, we used stable urinary metabolites of VOC  
455 exposure, a robust measure of short-term exposure. The existing literature has been

456 limited by the sample size of non-smokers with measured VOC metabolites. By  
457 combining 4 cycles of NHANES we increased the non-smoking sample size resulting in  
458 the largest study of VOC metabolites and BP among the general, non-smoking US  
459 population. Because metabolites from the same parent VOCs are highly correlated, we  
460 used hierarchical BKMR to confirm single-pollutant models after taking correlated VOC  
461 co-exposures into account, as well as determined the effects of VOC mixtures on BP  
462 and hypertension. These mixture analyses were only exploratory as a weighting  
463 scheme for complex survey designs has not yet been developed for BKMR.

464

465 Other limitations include the cross-sectional design and potential for exposure  
466 misclassification. Data from other cohorts designed to study cardiovascular health, like  
467 the Multi-Ethnic Study of Atherosclerosis, may help elucidate differences in  
468 cardiovascular risk among VOC exposure groups, particularly with a longitudinal design  
469 to evaluate changes in BP levels and hypertension risk over time.

## 470 **PERSPECTIVES**

471

472 This study in NHANES found that metabolites of acrolein and 1,3-butadiene were  
473 associated with higher SBP and risk of hypertension, in the non-smoking, general US  
474 population. Additional research is needed to characterize the contribution of non-  
475 smoking related environmental VOC exposures to cardiovascular risk and to develop  
476 policy and interventions to curb preventable exposure to VOCs and further reduce the  
477 risk of CVD.

478

479 **NOVELTY AND RELEVANCE**

480 What is New?

- 481       • This is the largest biomonitoring study of VOC exposure and elevated blood  
482       pressure in the general, non-smoking U.S. population.
- 483       • VOCs present in the environment and/or endogenous VOCs are associated with  
484       higher systolic BP and greater prevalence of hypertension.

485

486 What is Relevant?

- 487       • VOC exposure, independent of cigarette smoking, may contribute to the growing  
488       prevalence of cardiovascular diseases

489

490 Clinical/Pathophysiological Implications

- 491       • Reduction of VOC exposure may improve cardiovascular health.

492

493 **ACKNOWLEDGEMENTS**

494 Data and materials produced by Federal agencies are in the public domain and may be  
495 reproduced without permission. However, the authors would like to thank participants in  
496 the National Health and Nutrition Examination Surveys (NHANES).

497 **SOURCES OF FUNDING**

498 Work in the authors' laboratories is supported by NIEHS grants P42ES023716,  
499 P42ES033719, P30ES009089, R01ES029967, and T32ES00732221.

500 **DISCLOSURES**

501 The authors have no conflicts of interest to disclose.

502 **SUPPLEMENTAL MATERIAL**

503 Tables S1-S5  
504 Figures S1-S5  
505

506 **REFERENCES**

507

508

509

510

511

512

513

514

515

516

517

518

519

520

521

522

523

524

525

526

527

528

529

530

531

532

533

534

535

536

537

538

539

540

541

542

543

544

545

546

547

548

549

550

551

552

553

554

555

556

557

558

559

1. McDonald BC, de Gouw JA, Gilman JB, Jathar SH, Akherati A, Cappa CD, et al. Volatile chemical products emerging as largest petrochemical source of urban organic emissions. *Science (New York, N.Y.)*. 2018;359:760-764
2. Landrigan PJ, Fuller R, Acosta NJR, Adeyi O, Arnold R, Basu NN, et al. The lancet commission on pollution and health. *Lancet (London, England)*. 2018;391:462-512
3. Armor JN. Volatile organic compounds: An overview. *Environmental catalysis*. American Chemical Society; 1994:298-300.
4. United States Environmental Protection Agency U. Volatile organic compounds emissions. *Report on the Environment*.
5. Jerrett M, Burnett RT, Pope CA, Ito K, Thurston G, Krewski D, et al. Long-term ozone exposure and mortality. *New England Journal of Medicine*. 2009;360:1085-1095
6. Jimenez JL, Canagaratna MR, Donahue NM, Prevot ASH, Zhang Q, Kroll JH, et al. Evolution of organic aerosols in the atmosphere. *Science (New York, N.Y.)*. 2009;326:1525
7. Danforth CG, Portier C, Ensor KB, Hopkins L, Evans B, Quist AJL, et al. Development and demonstration of a data visualization platform of short-term guidelines for ambient air levels of benzene during disaster response in houston, tx. *Integrated Environmental Assessment and Management*.n/a
8. U.S. Environmental Protection Agency. Technical overview of volatile organic compounds. *Indoor Air Quality*. 2017;2019
9. Kehrer JP, Biswal SS. The molecular effects of acrolein. *Toxicol Sci*. 2000;57:6-15
10. Esterbauer H, Schaur RJ, Zollner H. Chemistry and biochemistry of 4-hydroxynonenal, malonaldehyde and related aldehydes. *Free Radic Biol Med*. 1991;11:81-128
11. Uchida K. Role of reactive aldehyde in cardiovascular diseases. *Free Radic Biol Med*. 2000;28:1685-1696
12. Xu X, Freeman NC, Dailey AB, Ilacqua VA, Kearney GD, Talbott EO. Association between exposure to alkylbenzenes and cardiovascular disease among national health and nutrition examination survey (nhanes) participants. *International journal of occupational and environmental health*. 2009;15:385-391
13. Shim YH, Ock JW, Kim Y-J, Kim Y, Kim SY, Kang D. Association between heavy metals, bisphenol a, volatile organic compounds and phthalates and metabolic syndrome. *Int J Environ Res Public Health*. 2019;16:671
14. McGraw KE, Riggs DW, Rai S, Navas-Acien A, Xie Z, Lorkiewicz P, et al. Exposure to volatile organic compounds – acrolein, 1,3-butadiene, and crotonaldehyde – is associated with vascular dysfunction. *Environmental Research*. 2021:110903
15. McGraw KEaK, Stacey L. and Riggs, Daniel W. and Rai, Shesh N. and DeJarnett, Natasha K. and Xie, Zhengzhi and Keith, Rachel J. and Oshunbade, Adebamike A. and Hall, Michael E. and Shimbo, Daichi and Bhatnagar, Aruni. . Exposure to volatile organic compounds is associated with hypertension in black adults: The jackson heart study. . *Available at SSRN*. 2022
16. DeJarnett N, Conklin DJ, Riggs DW, Myers JA, O'Toole TE, Hamzeh I, et al. Acrolein exposure is associated with increased cardiovascular disease risk. *Journal of the American Heart Association*. 2014;3
17. Abplanalp W, DeJarnett N, Riggs DW, Conklin DJ, McCracken JP, Srivastava S, et al. Benzene exposure is associated with cardiovascular disease risk. *PLoS one*. 2017;12:e0183602
18. Nalini M, Poustchi H, Bhandari D, Chang CM, Blount BC, Wang L, et al. Volatile organic compounds and mortality from ischemic heart disease: A case-cohort study. *American Journal of Preventive Cardiology*. 2024:100700
19. Whelton PK, Carey RM, Aronow WS, Casey DE, Collins KJ, Dennison Himmelfarb C, et al. 2017 acc/aha/aapa/abc/acpm/ags/apha/ash/aspc/nma/pcna guideline for the prevention, detection, evaluation, and management of high blood pressure in adults: A report of the american college of cardiology/american heart association task force on clinical practice guidelines. *Hypertension*. 2018;71:e13-e115



- 560 20. U.S. Department of Health and Human Services. National health and nutrition examination  
561 survey: Plan and operations, 1999-2010. 2013
- 562 21. Centers for Disease Control and Prevention (CDC). National health and nutrition examination  
563 survey data. 2011-2018
- 564 22. centers for Disease Control and Prevention (CDC). Laboratory procedure manual. *Antimony,*  
565 *Arsenic, Barium, Beryllium, Cadmium, Cesium, Cobalt, Lead, Manganese, Molybdenum,*  
566 *Platinum, Strontium, Thallium, Tin, Tungsten, and Uranium.* 2012:63
- 567 23. Centers for Disease Control and Prevention C. Laboratory procedure manual: Volatile organic  
568 compound (voc)s metabolites. 2011
- 569 24. Inker LA, Eneanya ND, Coresh J, Tighiouart H, Wang D, Sang Y, et al. New creatinine- and  
570 cystatin c–based equations to estimate gfr without race. *New England Journal of Medicine.*  
571 2021;385:1737-1749
- 572 25. Centers for Disease Control and Prevention (CDC). Module 3: Weighting. *National Health and*  
573 *Nutrition Examination Survey.* 2022
- 574 26. Zou G. A modified poisson regression approach to prospective studies with binary data. *American*  
575 *Journal of Epidemiology.* 2004;159:702-706
- 576 27. Fox ER, Samdarshi TE, Musani SK, Pencina MJ, Sung JH, Bertoni AG, et al. Development and  
577 validation of risk prediction models for cardiovascular events in black adults: The jackson heart  
578 study cohort. *JAMA Cardiology.* 2016;1:15-25
- 579 28. Forde AT, Sims M, Muntner P, Lewis T, Onwuka A, Moore K, et al. Discrimination and  
580 hypertension risk among african americans in the jackson heart study. *Hypertension.*  
581 2020;76:715-723
- 582 29. Bobb JF, Valeri L, Claus Henn B, Christiani DC, Wright RO, Mazumdar M, et al. Bayesian kernel  
583 machine regression for estimating the health effects of multi-pollutant mixtures. *Biostatistics.*  
584 2015;16:493-508
- 585 30. Bobb JF. Bayesian kernel machine regression [r package bkmr  
586 version 0.2.0]. 2017
- 587 31. Balakrishnan P, Beaty T, Young JH, Colantuoni E, Matsushita K. Methods to estimate underlying  
588 blood pressure: The atherosclerosis risk in communities (aric) study. *PLoS one.*  
589 2017;12:e0179234-e0179234
- 590 32. R Core Team. R: A language and environment for statistical computing. *R Foundation for*  
591 *Statistical Computing, Vienna, Austria.* 2019
- 592 33. Endres CJ. Nhanesa: Nhanes data retrieval. 2019
- 593 34. Wickham et al. Welcome to the tidyverse. *Journal of Open Source Software.* 2019;4
- 594 35. Lumley T. Complex surveys: A guide to analysis using r: A guide to analysis using r. 2010
- 595 36. Yang Q, Cogswell ME, Flanders WD, Hong Y, Zhang Z, Loustalot F, et al. Trends in  
596 cardiovascular health metrics and associations with all-cause and cvd mortality among us adults.  
597 *JAMA.* 2012;307:1273-1283
- 598 37. Mitchell GF, Conlin PR, Dunlap ME, Lacourcière Y, Arnold JM, Ogilvie RI, et al. Aortic diameter,  
599 wall stiffness, and wave reflection in systolic hypertension. *Hypertension.* 2008;51:105-111
- 600 38. Conklin DJ. Acute cardiopulmonary toxicity of inhaled aldehydes: Role of trpa1. *Annals of the*  
601 *New York Academy of Sciences.* 2016;1374:59-67
- 602 39. Stevens JF, Maier CS. Acrolein: Sources, metabolism, and biomolecular interactions relevant to  
603 human health and disease. *Molecular nutrition & food research.* 2008;52:7-25
- 604 40. McGraw KE, Konkle SL, Riggs DW, Rai SN, DeJarnett N, Xie Z, et al. Exposure to volatile  
605 organic compounds is associated with hypertension in black adults: The jackson heart study.  
606 *Environmental Research.* 2023;223:115384
- 607 41. Xu J, Niehoff NM, White AJ, Werder EJ, Sandler DP. Fossil-fuel and combustion-related air  
608 pollution and hypertension in the sister study. *Environ Pollut.* 2022;315:120401
- 609 42. Walker VE, Degner A, Carter EW, Nicklas JA, Walker DM, Tretyakova N, et al. 1,3-butadiene  
610 metabolite 1,2,3,4 diepoxybutane induces DNA adducts and micronuclei but not t(9;22)  
611 translocations in human cells. *Chemico-Biological Interactions.* 2019;312:108797
- 612 43. Boogaard PJ, van Sittert NJ, Megens HJ. Urinary metabolites and haemoglobin adducts as  
613 biomarkers of exposure to 1,3-butadiene: A basis for 1,3-butadiene cancer risk assessment.  
614 *Chem Biol Interact.* 2001;135-136:695-701



- 615 44. van Sittert NJ, Megens HJ, Watson WP, Boogaard PJ. Biomarkers of exposure to 1,3-butadiene  
616 as a basis for cancer risk assessment. *Toxicol Sci.* 2000;56:189-202
- 617 45. Conklin DJ, Ogunwale MA, Chen Y, Theis WS, Nantz MH, Fu X-A, et al. Electronic cigarette-  
618 generated aldehydes: The contribution of e-liquid components to their formation and the use of  
619 urinary aldehyde metabolites as biomarkers of exposure. *Aerosol Sci Technol.* 2018;52:1219-  
620 1232
- 621 46. Grant RL, Jenkins AF. Use of in vivo and in vitro data to derive a chronic reference value for  
622 crotonaldehyde based on relative potency to acrolein. *Journal of toxicology and environmental*  
623 *health. Part B, Critical reviews.* 2015;18:327-343
- 624 47. National Center for Biotechnology Information. Crotonaldehyde.CID=447466
- 625 48. Carrieri M, Bartolucci GB, Paci E, Sacco P, Pignini D, Zaratin L, et al. Validation of a radial  
626 diffusive sampler for measuring occupational exposure to 1,3-butadiene. *Journal of*  
627 *Chromatography A.* 2014;1353:114-120
- 628 49. Carmella SG, Chen M, Han S, Briggs A, Jensen J, Hatsukami DK, et al. Effects of smoking  
629 cessation on eight urinary tobacco carcinogen and toxicant biomarkers. *Chem Res Toxicol.*  
630 2009;22:734-741
- 631 50. Lin C-Y, Lee H-L, Jung W-T, Sung F-C, Su T-C. The association between urinary levels of 1,3-  
632 butadiene metabolites, cardiovascular risk factors, microparticles, and oxidative stress products in  
633 adolescents and young adults. *Journal of Hazardous Materials.* 2020;396:122745
- 634 51. Tevis DS, Willmore A, Bhandari D, Bowman B, Biren C, Kenwood BM, et al. Large differences in  
635 urinary benzene metabolite s-phenylmercapturic acid quantitation: A comparison of five lc-ms  
636 methods. *Journal of Analytical Toxicology.* 2020;45:657-665
- 637 52. National Health and Nutrition Examination Survey. Volatile organic compound (voc) metabolites -  
638 urine (uvoc\_g). *2011-2012 Data Documentation, Codebook, and Frequencies.* 2011-2012
- 639 53. Mannisto T, Mendola P, Liu D, Leishear K, Sherman S, Laughon SK. Acute air pollution exposure  
640 and blood pressure at delivery among women with and without hypertension. *Am J Hypertens.*  
641 2015;28:58-72
- 642 54. Zhu Y, Zhang C, Liu D, Ha S, Kim SS, Pollack A, et al. Ambient air pollution and risk of  
643 gestational hypertension. *Am J Epidemiol.* 2017;186:334-343
- 644 55. Matanoski GM, Santos-Burgoa C, Schwartz L. Mortality of a cohort of workers in the styrene-  
645 butadiene polymer manufacturing industry (1943-1982). *Environ Health Perspect.* 1990;86:107-  
646 117
- 647 56. Divine BJ, Hartman CM. Mortality update of butadiene production workers. *Toxicology.*  
648 1996;113:169-181
- 649 57. Matanoski GM, Tao X. Styrene exposure and ischemic heart disease: A case-cohort study.  
650 *American Journal of Epidemiology.* 2003;158:988-995
- 651
- 652

653 **TABLES**

654

655 **Table 1.** Participant characteristics across categories of hypertension, restricted to non-  
 656 smoking participants with available blood pressure examination data and urinary VOCs,  
 657 n=4,430 NHANES 2011-2018 participants. Continuous variables are reported as  
 658 median [interquartile range, IQR] and categorical variables as number (%). Percentages  
 659 are population weighted.

660

|                                    | Overall              | No Hypertension      | Hypertension         |
|------------------------------------|----------------------|----------------------|----------------------|
| n                                  | 4,430                | 2,819                | 1,611                |
| Age (years)                        | 48 [33, 62]          | 40 [28, 54]          | 62 [54, 71]          |
| Sex                                |                      |                      |                      |
| Male                               | 2,044 (46.0)         | 1,259 (45.3)         | 785 (47.5)           |
| Female                             | 2,386 (54.0)         | 1,560 (54.7)         | 826 (52.5)           |
| Race/Ethnicity                     |                      |                      |                      |
| Mexican American                   | 681 (9.6)            | 494 (11.3)           | 187 (6.1)            |
| Other Hispanic                     | 533 (7.3)            | 369 (8.4)            | 164 (5.0)            |
| Non-Hispanic White                 | 1,540 (64.8)         | 943 (62.8)           | 597 (69.0)           |
| Non-Hispanic Black                 | 868 (9.7)            | 449 (8.3)            | 419 (12.6)           |
| Non-Hispanic Asian                 | 679 (6.3)            | 478 (6.8)            | 201 (5.2)            |
| Other Race, incl Multi             | 129 (2.4)            | 86 (2.5)             | 43 (2.2)             |
| Education                          |                      |                      |                      |
| Less than HS Diploma               | 884 (12.2)           | 500 (11.3)           | 384 (14.0)           |
| High School Grad/GED               | 926 (20.7)           | 553 (19.3)           | 373 (23.6)           |
| Some College                       | 1,329 (31.1)         | 841 (30.1)           | 488 (33.3)           |
| College Degree or More             | 1,291 (36.0)         | 925 (39.4)           | 366 (28.9)           |
| Income                             |                      |                      |                      |
| \$0-\$24,999                       | 1,002 (15.9)         | 563 (14.6)           | 439 (18.7)           |
| \$25,000-\$54,999                  | 1,308 (29.1)         | 828 (29.4)           | 480 (28.5)           |
| \$55,000-\$74,999                  | 490 (13.1)           | 335 (13.4)           | 155 (12.4)           |
| ≥\$75,000                          | 1,352 (41.9)         | 913 (42.7)           | 439 (40.4)           |
| BMI (kg/m <sup>2</sup> )           | 28.3 [24.5, 33.0]    | 27.2 [23.7, 31.7]    | 30.7 [26.6, 35.8]    |
| Serum Cotinine (ng/mL)             | 0.02 [0.01, 0.05]    | 0.02 [0.01, 0.05]    | 0.02 [0.01, 0.04]    |
| eGFR (mL/min/1.73 m <sup>2</sup> ) | 97.6 [82.0, 111.9]   | 103.3 [88.4, 116.7]  | 86.2 [68.9, 98.9]    |
| HDL (mg/dL)                        | 53.0 [43.0, 63.0]    | 53.3 [44.0, 64.0]    | 50.0 [41.0, 61.0]    |
| Triglycerides (mg/dL)              | 115.0 [77.0, 176.0]  | 104.0 [72.0, 165.0]  | 134.0 [94.0, 206.0]  |
| Total Cholesterol (mg/dL)          | 186.0 [161.0, 214.0] | 185.0 [160.0, 213.0] | 191.5 [163.0, 218.0] |
| SBP (mmHg)                         | 120.0 [110.7, 132.0] | 114.7 [107.3, 123.3] | 136.0 [124.0, 147.3] |
| DBP (mmHg)                         | 71.3 [64.7, 78.0]    | 70.0 [64.0, 76.0]    | 75.3 [66.7, 84.0]    |
| Underlying SBP (mmHg) <sup>a</sup> | 122.0 [111.3, 135.3] | 114.7 [107.3, 123.3] | 142.7 [133.3, 152.7] |
| Underlying DBP (mmHg) <sup>b</sup> | 72.3 [65.3, 79.3]    | 70.0 [64.0, 76.0]    | 79.0 [71.0, 87.0]    |
| Hypertension Stage 1 <sup>c</sup>  | 2,201 (46.9)         | 590 (21.5)           | 1,611 (100.0)        |
| Hypertension MDDX <sup>d</sup>     | 1,542 (31.2)         | 216 (7.0)            | 1,326 (81.9)         |
| CVD <sup>e</sup>                   | 382 (7.6)            | 100 (3.8)            | 282 (15.3)           |

|                                |              |           |              |
|--------------------------------|--------------|-----------|--------------|
| Diabetes Mellitus <sup>f</sup> | 439 (7.9)    | 126 (3.1) | 313 (17.9)   |
| BP Medications                 | 1,213 (24.1) | 0 (0.0)   | 1,213 (74.5) |

---

661 <sup>a</sup> Underlying Systolic Blood Pressure: a 10 mmHg constant was added to SBP  
662 measurement of NHANES participants who self-report taking BP medications <sup>b</sup>  
663 Underlying Diastolic Blood Pressure: a 5 mmHg constant was added to SBP  
664 measurement of NHANES participants who self-report taking BP medications  
665 <sup>c</sup> Hypertension Stage 1 is defined as mean SBP  $\geq$  130 mmHg, DBP  $\geq$  80 mm Hg, or  
666 taking BP medications  
667 <sup>d</sup> Hypertension MDDX is defined as physician-diagnosed hypertension  
668 <sup>e</sup> CVD is defined if a physician has ever told you have congestive heart failure, coronary  
669 heart disease, angina, heart attack, or stroke  
670 <sup>f</sup> Diabetes Mellitus is defined if a physician ever told you have diabetes mellitus or self-  
671 report of taking diabetes medications  
672  
673

674 **Table 2.** Median and interquartile ranges of VOC metabolite levels (ng/mg creatinine)  
 675 across categories of hypertension, restricted to participants with available blood  
 676 pressure examination data and urinary VOCs, among 4,430 NHANES 2011-2018  
 677 participants. MU was measured in n=1,046 NHANES 2017-2018 participants and PMA  
 678 was measured in n=3,207 NHANES 2011-2016 participants.  
 679

| Parent         | Short <sup>a</sup> | Overall              | No Hypertension      | Hypertension         |
|----------------|--------------------|----------------------|----------------------|----------------------|
|                |                    | 4,430                | 2,819                | 1,611                |
| Acrolein       | CEMA               | 82.3 [54.5, 128.2]   | 76.2 [50.4, 116.7]   | 96.7 [64.5, 150.4]   |
| Acrolein       | 3HPMA              | 193.7 [130.4, 297.6] | 189.6 [127.4, 290.0] | 202.8 [137.6, 310.8] |
| Benzene        | MU <sup>b</sup>    | 44.8 [26.8, 93.0]    | 43.3 [24.5, 93.0]    | 47.7 [29.0, 93.1]    |
| Benzene        | PMA <sup>c</sup>   | 0.7 [0.5, 1.2]       | 0.8 [0.4, 1.3]       | 0.7 [0.5, 1.1]       |
| 1,3-Butadiene  | DHBMA              | 300.0 [236.3, 385.1] | 288.6 [227.5, 363.5] | 340.1 [264.1, 429.8] |
| 1,3-Butadiene  | MHBMA3             | 3.9 [2.6, 6.0]       | 3.7 [2.5, 5.9]       | 4.2 [2.9, 6.2]       |
| Crotonaldehyde | HPMMA              | 185.5 [143.0, 264.6] | 173.6 [136.9, 250.0] | 212.7 [159.3, 298.8] |
| Styrene        | PGA                | 197.8 [148.5, 260.4] | 190.6 [142.1, 251.0] | 214.1 [158.4, 281.3] |
| Styrene        | MA                 | 122.4 [89.5, 164.4]  | 120.2 [88.9, 159.2]  | 128.4 [91.9, 172.9]  |

680 <sup>a</sup> Metabolite long names: CEMA, N-Acetyl-S-(2-carboxyethyl)-L-cysteine; 3HPMA, N-  
 681 Acetyl-S-(3-hydroxypropyl)-L-cysteine; PMA, N-Acetyl-S-(phenyl)-L-cysteine; MU, *t,t*-  
 682 Muconic Acid; DHBMA, N-Acetyl-S-(3,4-dihydroxybutyl)-L-cysteine; MHBMA3, N-Acetyl-  
 683 S-(4-hydroxy-2-butenyl)-L-cysteine; HPMMA, N-Acetyl-S-(3-hydroxypropyl-1-methyl)-L-  
 684 cysteine; PGA, Phenylglyoxylic acid; MA, Mandelic acid

685 <sup>b</sup> MU was measured in n=1,046 NHANES 2017-2018 participants, n=604 did not have  
 686 hypertension and n=442 did have hypertension

687 <sup>c</sup> PMA was measured in n=3,207 NHANES 2011-2016 participants, n=2,104 did not  
 688 have hypertension and n=1,103 did have hypertension

689 **Table 3.** Mean differences (95% confidence interval) of systolic blood pressure (SBP), diastolic blood pressure (DBP),  
690 and prevalence ratios – PR (95% confidence interval) of hypertension by levels (ng/mg creatinine) of urinary VOC  
691 metabolites, restricted to participants with available blood pressure examination data and urinary VOCs, n=4,430  
692 NHANES 2011-2018 participants. MU was measured in n=1,046 NHANES 2017-2018 participants and PMA was  
693 measured in n=3,207 NHANES 2011-2016 participants. Model 1 was adjusted for age, sex, race and ethnicity, education,  
694 BMI, eGFR, and NHANES cycle year. Model 2 was additionally adjusted for HDL-cholesterol, triglycerides, total  
695 cholesterol, diabetes status, and antihypertensive medication.  
696

|                        | N     | SBP                |                     | DBP                 |                     | Hypertension      |                   |
|------------------------|-------|--------------------|---------------------|---------------------|---------------------|-------------------|-------------------|
|                        |       | Model 1            | Model 2             | Model 1             | Model 2             | Model 1           | Model 2           |
| <b>Acrolein, CEMA</b>  |       |                    |                     |                     |                     |                   |                   |
| Q1 (3.64, 56.33)       | 1,108 | 0.00 (referent)    | 0.00 (referent)     | 0.00 (referent)     | 0.00 (referent)     | 1.00 (referent)   | 1.00 (referent)   |
| Q2 (56.34, 85.00)      | 1,107 | 0.24 (-1.19, 1.67) | 0.00 (-1.41, 1.41)  | 0.85 (-0.23, 1.94)  | 0.63 (-0.48, 1.73)  | 1.01 (0.98, 1.05) | 1.00 (0.98, 1.03) |
| Q3 (85.06, 128.2)      | 1,107 | 0.56 (-1.03, 2.15) | 0.09 (-1.38, 1.55)  | 0.34 (-0.84, 1.52)  | -0.07 (-1.20, 1.05) | 1.03 (0.99, 1.07) | 1.01 (0.98, 1.04) |
| Q4 (128.3, 4353)       | 1,108 | 1.61 (0.07, 3.15)  | 0.8 (-0.77, 2.37)   | 0.32 (-0.88, 1.53)  | -0.13 (-1.22, 0.95) | 1.06 (1.02, 1.09) | 1.01 (0.99, 1.03) |
| p75 vs p25             | 4,430 | 0.95 (0.17, 1.73)  | 0.53 (-0.25, 1.3)   | 0.15 (-0.37, 0.67)  | -0.09 (-0.55, 0.37) | 1.03 (1.01, 1.05) | 1.00 (1.00, 1.01) |
| <b>Acrolein, 3HPMA</b> |       |                    |                     |                     |                     |                   |                   |
| Q1 (6.81, 133.33)      | 1,110 | 0.00 (referent)    | 0.00 (referent)     | 0.00 (referent)     | 0.00 (referent)     | 1.00 (referent)   | 1.00 (referent)   |
| Q2 (133.45, 197.8)     | 1,105 | 0.14 (-1.16, 1.43) | -0.11 (-1.41, 1.18) | -0.93 (-2.04, 0.18) | -1.02 (-2.12, 0.09) | 1.02 (0.99, 1.05) | 1.00 (0.98, 1.02) |
| Q3 (198.0, 307.2)      | 1,107 | 0.56 (-0.98, 2.10) | 0.55 (-1.01, 2.12)  | -0.77 (-2.00, 0.46) | -0.6 (-1.77, 0.57)  | 1.02 (0.99, 1.06) | 1.01 (0.99, 1.04) |
| Q4 (307.3, 7947)       | 1,108 | 1.28 (-0.33, 2.90) | 1.06 (-0.62, 2.74)  | -0.34 (-1.76, 1.09) | -0.24 (-1.60, 1.12) | 1.05 (1.01, 1.09) | 1.02 (0.99, 1.05) |
| p75 vs p25             | 4,430 | 0.41 (-0.31, 1.13) | 0.35 (-0.38, 1.09)  | -0.18 (-0.80, 0.43) | -0.13 (-0.71, 0.46) | 1.02 (1.00, 1.03) | 1.00 (0.99, 1.01) |
| <b>Benzene, MU</b>     |       |                    |                     |                     |                     |                   |                   |
| Q1 (6.74, 24.23)       | 262   | 0.00 (referent)    | 0.00 (referent)     | 0.00 (referent)     | 0.00 (referent)     | 1.00 (referent)   | 1.00 (referent)   |
| Q2 (24.24, 42.54)      | 261   | 2.29 (-0.20, 4.78) | 1.93 (-0.93, 4.79)  | 2.50 (0.33, 4.68)   | 1.95 (-0.32, 4.22)  | 1.01 (0.92, 1.10) | 1.01 (0.96, 1.07) |
| Q3 (42.77, 84.86)      | 261   | 3.29 (-0.25, 6.82) | 2.78 (-0.22, 5.79)  | 1.04 (-1.88, 3.97)  | 0.36 (-1.97, 2.69)  | 1.01 (0.92, 1.10) | 1.01 (0.95, 1.08) |
| Q4 (85.14, 9294)       | 262   | 2.75 (-0.65, 6.15) | 2.36 (-0.74, 5.45)  | -1.32 (-4.09, 1.46) | -1.99 (-4.37, 0.39) | 1.01 (0.95, 1.08) | 1.01 (0.96, 1.07) |
| p75 vs p25             | 1,046 | 0.76 (0.05, 1.48)  | 0.65 (-0.04, 1.35)  | -0.11 (-0.56, 0.35) | -0.28 (-0.65, 0.08) | 1.00 (0.98, 1.02) | 1.00 (0.99, 1.01) |
| <b>Benzene, PMA</b>    |       |                    |                     |                     |                     |                   |                   |
| Q1 (0.09, 0.420)       | 809   | 0.00 (referent)    | 0.00 (referent)     | 0.00 (referent)     | 0.00 (referent)     | 1.00 (referent)   | 1.00 (referent)   |

|                   |       |                    |                    |                    |                    |                   |                   |
|-------------------|-------|--------------------|--------------------|--------------------|--------------------|-------------------|-------------------|
| Q2 (0.424, 0.695) | 804   | 0.73 (-1.26, 2.73) | 0.79 (-1.19, 2.77) | 0.12 (-1.13, 1.36) | 0.42 (-0.84, 1.68) | 1.03 (0.98, 1.08) | 1.01 (0.97, 1.04) |
| Q3 (0.70, 1.145)  | 801   | 1.09 (-0.80, 2.97) | 1.05 (-0.86, 2.96) | 0.94 (-0.39, 2.27) | 0.98 (-0.28, 2.23) | 1.01 (0.97, 1.05) | 1.01 (0.98, 1.04) |
| Q4 (1.146, 13.00) | 793   | 1.44 (-0.60, 3.47) | 1.46 (-0.65, 3.57) | 0.76 (-0.51, 2.02) | 0.95 (-0.29, 2.19) | 1.00 (0.96, 1.03) | 0.99 (0.96, 1.02) |
| p75 vs p25        | 3,207 | 1.14 (-0.85, 3.13) | 1.17 (-0.84, 3.17) | 0.77 (-0.37, 1.92) | 0.86 (-0.23, 1.96) | 1.00 (0.99, 1.01) | 1.00 (0.99, 1.01) |

### 1,3-Butadiene, DHBMA

|                     |       |                    |                    |                     |                     |                   |                   |
|---------------------|-------|--------------------|--------------------|---------------------|---------------------|-------------------|-------------------|
| Q1 (2.75, 229.59)   | 1,108 | 0.00 (referent)    | 0.00 (referent)    | 0.00 (referent)     | 0.00 (referent)     | 1.00 (referent)   | 1.00 (referent)   |
| Q2 (229.62, 294.12) | 1,111 | 1.15 (-0.44, 2.75) | 1.08 (-0.45, 2.60) | -0.31 (-1.18, 0.55) | -0.26 (-1.12, 0.60) | 1.02 (0.99, 1.05) | 1.01 (0.98, 1.03) |
| Q3 (294.14, 375.0)  | 1,104 | 0.84 (-0.74, 2.42) | 0.64 (-0.96, 2.25) | 0.02 (-1.11, 1.14)  | 0.06 (-1.08, 1.21)  | 1.03 (0.99, 1.07) | 1.00 (0.98, 1.03) |
| Q4 (375.29, 3800)   | 1,107 | 2.46 (1.01, 3.92)  | 2.35 (0.91, 3.79)  | -0.87 (-2.05, 0.32) | -0.65 (-1.76, 0.46) | 1.05 (1.01, 1.09) | 1.02 (1.00, 1.05) |
| p75 vs p25          | 4,430 | 2.95 (1.06, 4.85)  | 2.93 (1.14, 4.72)  | -0.49 (-1.94, 0.96) | -0.18 (-1.56, 1.19) | 1.01 (1.00, 1.02) | 1.01 (1.00, 1.02) |

### 1,3-Butadiene, MHBMA3

|                  |       |                     |                     |                     |                      |                   |                   |
|------------------|-------|---------------------|---------------------|---------------------|----------------------|-------------------|-------------------|
| Q1 (0.21, 2.636) | 1,108 | 0.00 (referent)     | 0.00 (referent)     | 0.00 (referent)     | 0.00 (referent)      | 1.00 (referent)   | 1.00 (referent)   |
| Q2 (2.642, 3.85) | 1,110 | 1.48 (-0.17, 3.12)  | 1.18 (-0.38, 2.73)  | -0.84 (-1.72, 0.04) | -0.91 (-1.76, -0.05) | 1.04 (1.01, 1.08) | 1.02 (1.00, 1.04) |
| Q3 (3.86, 5.97)  | 1,104 | -0.14 (-1.76, 1.47) | -0.24 (-1.76, 1.27) | -1.09 (-2.18, 0.01) | -0.96 (-2.00, 0.08)  | 1.02 (0.99, 1.05) | 1.00 (0.98, 1.02) |
| Q4 (5.98, 328.4) | 1,108 | 0.60 (-0.74, 1.95)  | 0.51 (-0.87, 1.90)  | -0.54 (-1.80, 0.72) | -0.50 (-1.73, 0.73)  | 1.03 (0.99, 1.06) | 1.01 (0.99, 1.04) |
| p75 vs p25       | 4,430 | 0.02 (-0.48, 0.52)  | 0.01 (-0.50, 0.52)  | -0.23 (-0.74, 0.28) | -0.20 (-0.71, 0.30)  | 1.01 (1.00, 1.02) | 1.00 (1.00, 1.01) |

### Crotonaldehyde, HPMMA

|                    |       |                    |                    |                     |                     |                   |                   |
|--------------------|-------|--------------------|--------------------|---------------------|---------------------|-------------------|-------------------|
| Q1 (1.19, 140.31)  | 1,108 | 0.00 (referent)    | 0.00 (referent)    | 0.00 (referent)     | 0.00 (referent)     | 1.00 (referent)   | 1.00 (referent)   |
| Q2 (140.32, 185.0) | 1,108 | 1.00 (-0.76, 2.76) | 0.63 (-1.20, 2.47) | 1.13 (0.03, 2.23)   | 0.95 (-0.12, 2.03)  | 1.01 (0.98, 1.05) | 0.99 (0.97, 1.02) |
| Q3 (185.1, 265.85) | 1,106 | 1.25 (-0.19, 2.70) | 0.69 (-0.81, 2.19) | 0.68 (-0.63, 1.98)  | 0.64 (-0.67, 1.94)  | 1.05 (1.02, 1.08) | 1.00 (0.98, 1.03) |
| Q4 (265.91, 10947) | 1,108 | 1.27 (-0.46, 3.00) | 0.73 (-1.11, 2.57) | 0.3 (-1.14, 1.74)   | 0.43 (-0.94, 1.81)  | 1.06 (1.02, 1.10) | 1.01 (0.98, 1.04) |
| p75 vs p25         | 4,430 | 0.29 (-0.79, 1.37) | 0.10 (-1.02, 1.23) | -0.17 (-1.10, 0.76) | -0.06 (-0.92, 0.79) | 1.01 (0.99, 1.02) | 1.00 (1.00, 1.01) |

### Styrene, PGA

|                     |       |                     |                     |                     |                     |                   |                   |
|---------------------|-------|---------------------|---------------------|---------------------|---------------------|-------------------|-------------------|
| Q1 (3.94, 139.39)   | 1,108 | 0.00 (referent)     | 0.00 (referent)     | 0.00 (referent)     | 0.00 (referent)     | 1.00 (referent)   | 1.00 (referent)   |
| Q2 (139.41, 188.52) | 1,107 | -1.25 (-3.26, 0.75) | -1.02 (-3.03, 0.99) | -0.70 (-2.07, 0.67) | -0.42 (-1.73, 0.89) | 1.00 (0.96, 1.03) | 0.99 (0.96, 1.01) |
| Q3 (188.57, 250.0)  | 1,116 | -0.85 (-2.28, 0.57) | -0.77 (-2.22, 0.67) | -0.36 (-1.78, 1.06) | -0.18 (-1.53, 1.17) | 0.99 (0.96, 1.03) | 0.99 (0.97, 1.02) |
| Q4 (250.41, 32525)  | 1,099 | 0.24 (-1.85, 2.33)  | 0.05 (-2.05, 2.16)  | -1.02 (-2.51, 0.48) | -1.04 (-2.50, 0.42) | 1.02 (0.98, 1.06) | 1.01 (0.98, 1.03) |
| p75 vs p25          | 4,430 | 0.34 (-0.73, 1.41)  | 0.10 (-0.98, 1.18)  | -0.18 (-1.08, 0.72) | -0.25 (-1.12, 0.63) | 1.00 (0.99, 1.01) | 1.00 (0.99, 1.00) |

**Styrene, MA**

|                     |       |                     |                     |                      |                      |                   |                   |
|---------------------|-------|---------------------|---------------------|----------------------|----------------------|-------------------|-------------------|
| Q1 (4.17, 87.61)    | 1,108 | 0.00 (referent)     | 0.00 (referent)     | 0.00 (referent)      | 0.00 (referent)      | 1.00 (referent)   | 1.00 (referent)   |
| Q2 (87.62, 121.31)  | 1,107 | -0.96 (-2.61, 0.68) | -0.75 (-2.38, 0.89) | -1.47 (-2.62, -0.32) | -1.32 (-2.35, -0.29) | 0.99 (0.96, 1.02) | 1.00 (0.98, 1.03) |
| Q3 (121.32, 163.12) | 1,107 | 0.84 (-0.66, 2.34)  | 0.67 (-0.76, 2.10)  | 0.23 (-1.12, 1.58)   | 0.14 (-1.14, 1.42)   | 1.00 (0.97, 1.03) | 1.00 (0.98, 1.03) |
| Q4 (163.13, 27778)  | 1,108 | 1.28 (-0.50, 3.06)  | 1.12 (-0.63, 2.87)  | 0.36 (-1.01, 1.73)   | 0.45 (-0.81, 1.70)   | 1.05 (1.01, 1.08) | 1.03 (1.01, 1.06) |
| p75 vs p25          | 4,430 | 0.85 (-0.33, 2.02)  | 0.56 (-0.62, 1.74)  | 0.51 (-0.29, 1.32)   | 0.48 (-0.25, 1.20)   | 0.98 (0.95, 1.02) | 1.00 (0.97, 1.02) |

---

697

698 Metabolite long names: CEMA, N-Acetyl-S-(2-carboxyethyl)-L-cysteine; 3HPMA, N-Acetyl-S-(3-hydroxypropyl)-L-cysteine;  
699 PMA, N-Acetyl-S-(phenyl)-L-cysteine; MU, *t,t*-Muconic Acid; DHBMA, N-Acetyl-S-(3,4-dihydroxybutyl)-L-cysteine;  
700 MHBMA3, N-Acetyl-S-(4-hydroxy-2-butenyl)-L-cysteine; HPMMA, N-Acetyl-S-(3-hydroxypropyl-1-methyl)-L-cysteine;  
701 PGA, Phenylglyoxylic acid; MA, Mandelic acid

702

703 **FIGURES**

704

705 **Figure 1.** Mean differences (MD) (95% confidence interval) of systolic blood pressure  
706 (SBP) by urinary VOC levels (ng/mg creatinine) modeled as restricted quadratic splines  
707 for priority VOC metabolites among nonsmoking NHANES 2011-2018 participants  
708 (n=4,430). Lines (shaded areas) represent the MD (95%CI) of SBP and RR (95% CI) of  
709 hypertension by VOC metabolites modeled as restricted quadratic splines for log  
710 transformed VOC metabolite distributions with knots at 10th, 50th, and 90th percentiles.  
711 The reference value was set at the 10th percentile. Models were adjusted for age, sex,  
712 race and ethnicity, education, BMI, eGFR, and NHANES cycle year. The histograms in  
713 the background represent the distribution of each VOC metabolite (ng/mg creatinine).  
714 See Figure S2 for DBP.  
715

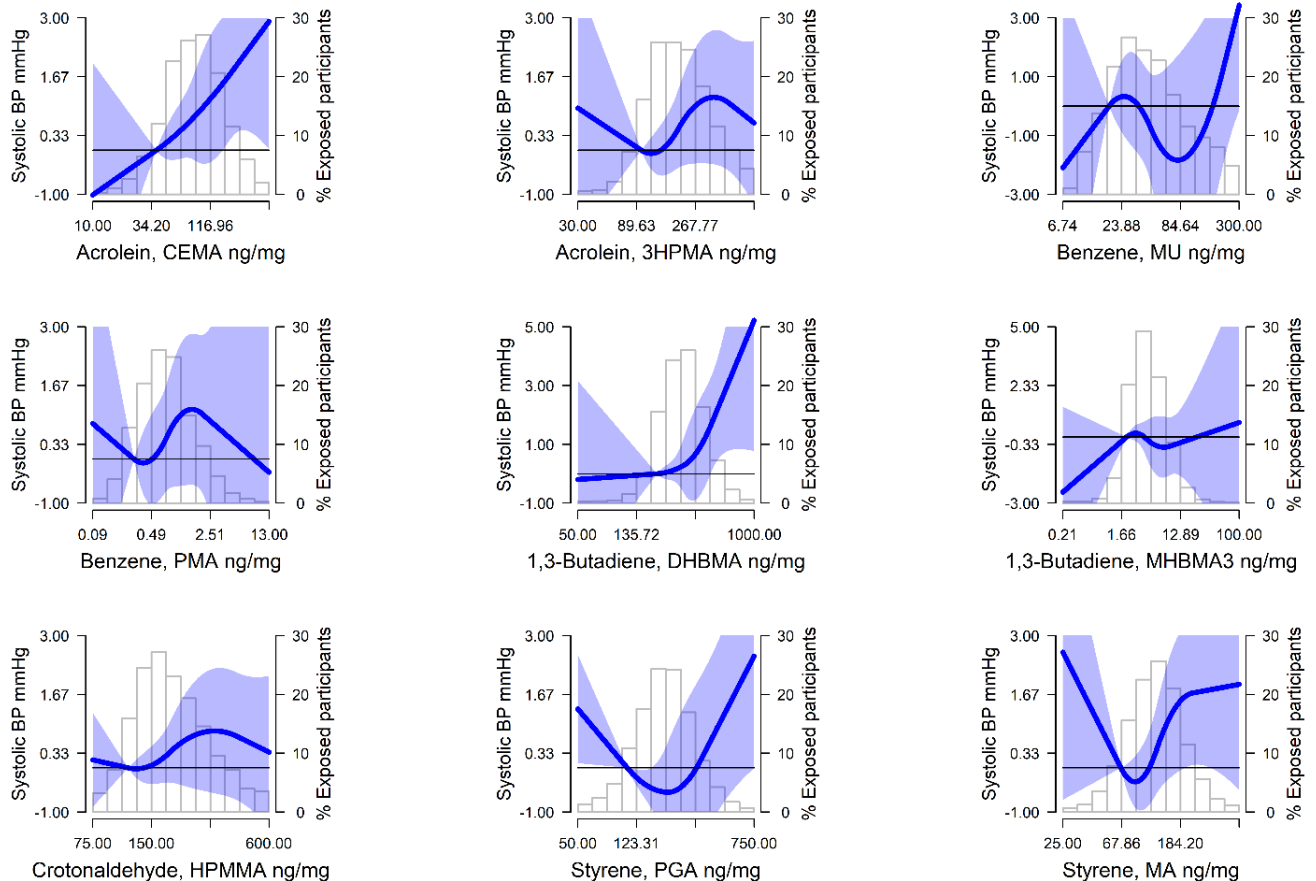

716

717



718 **Figure 2.** Prevalence ratios (PR) (95% confidence interval, CI) of hypertension by  
719 urinary VOC levels (ng/mg creatinine) modeled as restricted quadratic splines among  
720 nonsmoking NHANES 2011-2018 participants (n=4,430). Lines (shaded areas)  
721 represent the PR (95%CI) of hypertension by VOC metabolites modeled as restricted  
722 quadratic splines for log transformed VOC metabolite distributions with knots at 10th,  
723 50th, and 90th percentiles. The reference value was set at the 10th percentile. Models  
724 were adjusted for age, sex, race and ethnicity, education, BMI, eGFR, and NHANES  
725 cycle year. The histograms in the background represent the distribution of each VOC  
726 metabolite (ng/mg creatinine). See Figure S2 for DBP.  
727  
728

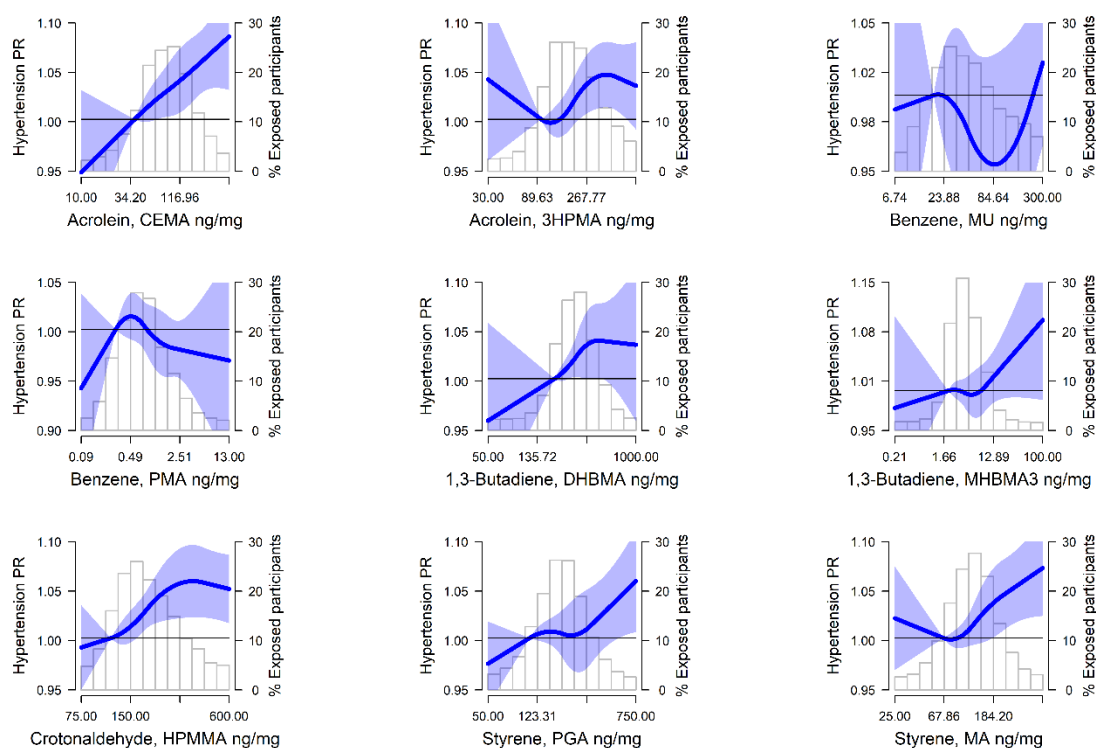

729  
730
